# Supplementary material
Source: PubMed Central journal article supplement (PMC3280145)

Supplemental Figure 1: Percentage of sequences for each spatial group classified using the RDP Classifier tool with an 80% confidence threshold.

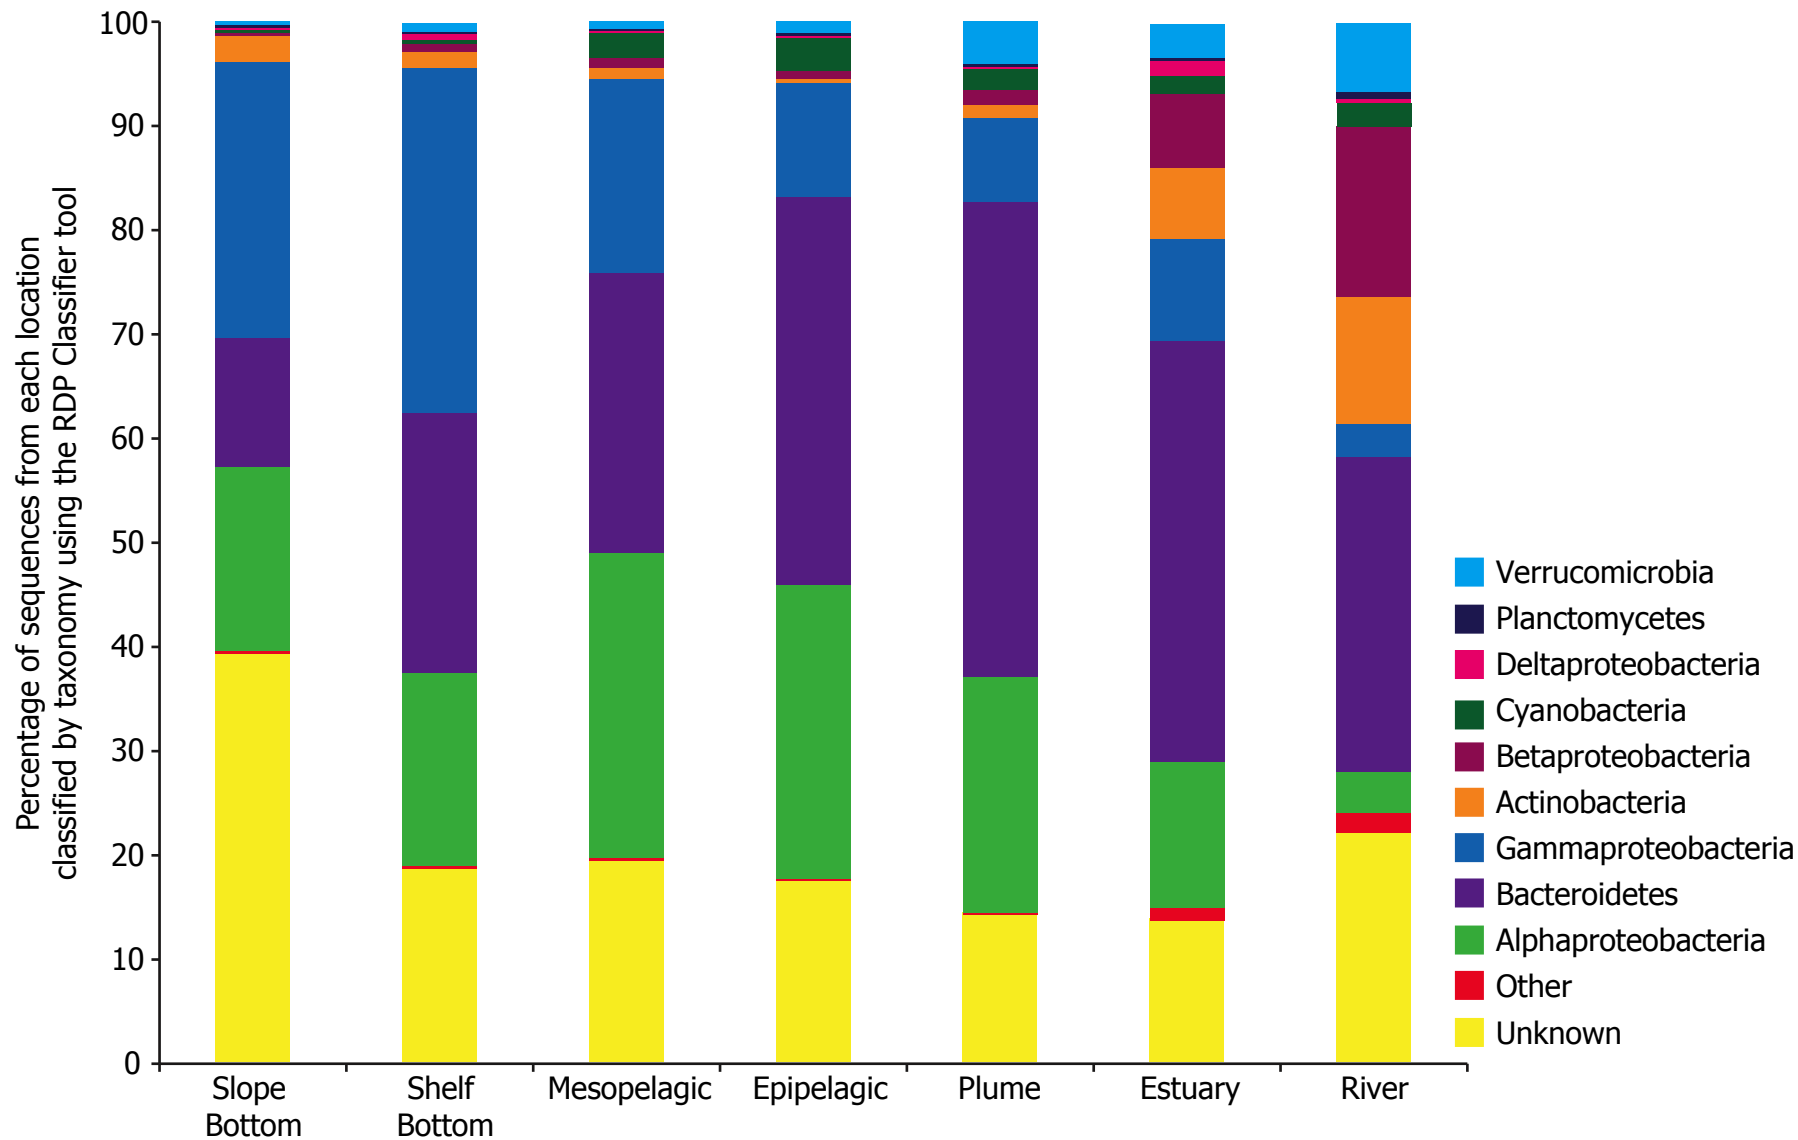

Supplemental Figure 2: Spatial distribution of the most abundant OTUs based on average relative abundance in each spatial group across the ordination of Figure 2. Taxonomic identification for each OTU is listed to the furthest classification possible as determined by the RDP Classifier tool with an 80% confidence threshold. Stress = 0.12

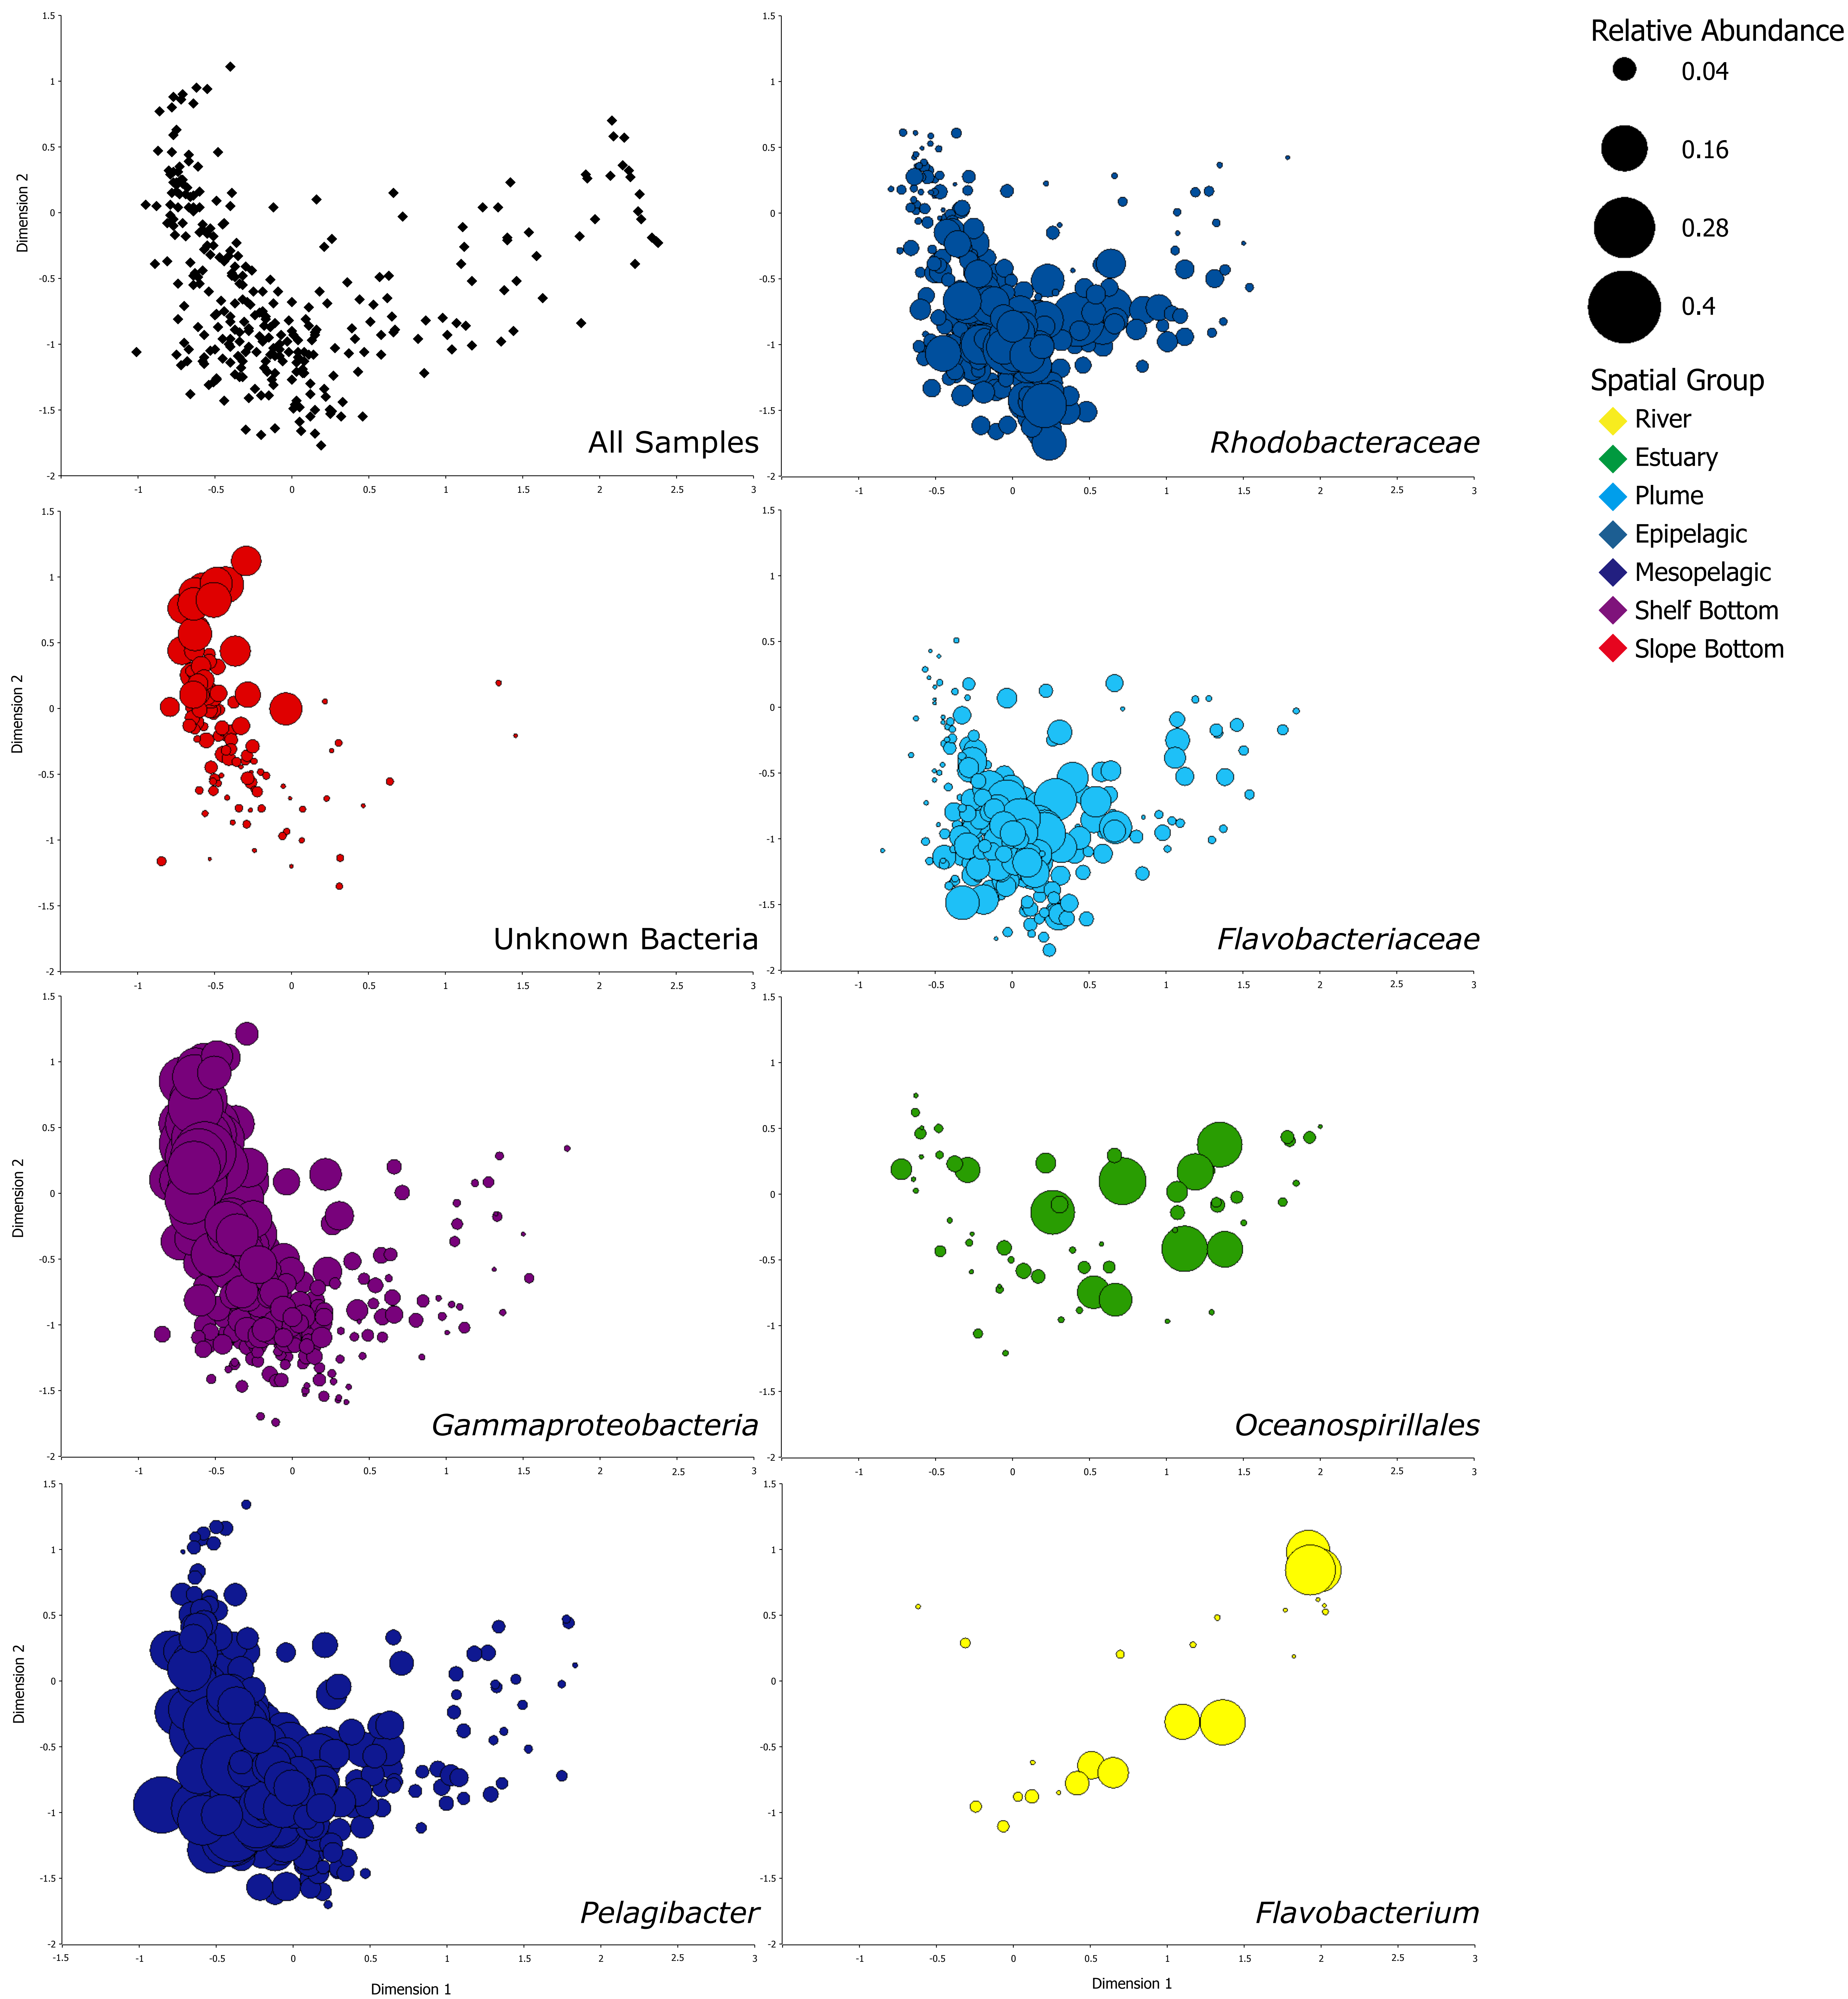

Supplement: ismej2011135x1.pdf [file ismej2011135x1.pdf]
