# Supplementary material
Source: PubMed Central journal article supplement (PMC3280145)
Supplement: ismej2011135x3.pdf [file ismej2011135x3.pdf]

Supplemental Table 2: Most abundant OTUs within each spatial group based on average relative abundance. Taxonomy was determined by the RDP Classifier tool with an 80% confidence threshold.

| Environment                                                                              | Taxonomy ( <i>Phylum, Class, Order, Family, Genus</i> )                                  | Average relative abundance within group (%)                                   |     |
|------------------------------------------------------------------------------------------|------------------------------------------------------------------------------------------|-------------------------------------------------------------------------------|-----|
| River                                                                                    | <i>Bacteroidetes, Flavobacteria, Flavobacteriales, Flavobacteriaceae, Flavobacterium</i> | 4.1                                                                           |     |
|                                                                                          | <i>Proteobacteria, Betaproteobacteria, Burkholderiales, Comamonadaceae</i>               | 4.0                                                                           |     |
|                                                                                          | <i>Proteobacteria</i>                                                                    | 3.4                                                                           |     |
|                                                                                          | Unknown Bacteria                                                                         | 3.3                                                                           |     |
|                                                                                          | <i>Actinobacteria, Actinobacteridae, Actinomycetales</i>                                 | 2.7                                                                           |     |
|                                                                                          | <i>Proteobacteria, Betaproteobacteria, Methylophilales, Methylophilaceae</i>             | 2.4                                                                           |     |
|                                                                                          | <i>Actinobacteria, Actinobacteridae, Actinomycetales</i>                                 | 2.4                                                                           |     |
|                                                                                          | <i>Verrucomicrobia</i>                                                                   | 1.8                                                                           |     |
|                                                                                          | <i>Bacteroidetes, Flavobacteria, Flavobacteriales, Flavobacteriaceae, Flavobacterium</i> | 1.6                                                                           |     |
|                                                                                          | <i>Actinobacteria</i>                                                                    | 1.3                                                                           |     |
|                                                                                          |                                                                                          | Sum: 27.0                                                                     |     |
|                                                                                          | Estuary                                                                                  | <i>Proteobacteria, Gammaproteobacteria, Oceanospirillales</i>                 | 2.5 |
|                                                                                          |                                                                                          | <i>Bacteroidetes, Flavobacteria, Flavobacteriales, Flavobacteriaceae</i>      | 2.4 |
| <i>Proteobacteria, Alphaproteobacteria, Rhodobacterales, Rhodobacteraceae</i>            |                                                                                          | 1.2                                                                           |     |
| <i>Bacteroidetes, Flavobacteria, Flavobacteriales, Cryomorphaceae, Fluviicola</i>        |                                                                                          | 1.2                                                                           |     |
| <i>Bacteroidetes, Flavobacteria, Flavobacteriales, Flavobacteriaceae</i>                 |                                                                                          | 1.2                                                                           |     |
| <i>Proteobacteria, Alphaproteobacteria, Rhodobacterales, Rhodobacteraceae</i>            |                                                                                          | 1.1                                                                           |     |
| <i>Proteobacteria, Betaproteobacteria, Burkholderiales, Comamonadaceae</i>               |                                                                                          | 1.1                                                                           |     |
| <i>Bacteroidetes, Flavobacteria, Flavobacteriales, Flavobacteriaceae, Flavobacterium</i> |                                                                                          | 0.9                                                                           |     |
| <i>Bacteroidetes</i>                                                                     |                                                                                          | 0.8                                                                           |     |
| <i>Bacteroidetes, Flavobacteria, Flavobacteriales, Flavobacteriaceae</i>                 |                                                                                          | 0.7                                                                           |     |
|                                                                                          |                                                                                          | Sum: 13.0                                                                     |     |
| Plume                                                                                    |                                                                                          | <i>Bacteroidetes, Flavobacteria, Flavobacteriales, Flavobacteriaceae</i>      | 3.9 |
|                                                                                          | <i>Bacteroidetes, Flavobacteria, Flavobacteriales, Flavobacteriaceae, Ulvibacter</i>     | 3.5                                                                           |     |
|                                                                                          | <i>Proteobacteria, Alphaproteobacteria, Rhodobacterales, Rhodobacteraceae</i>            | 2.7                                                                           |     |
|                                                                                          | <i>Bacteroidetes, Flavobacteria, Flavobacteriales, Flavobacteriaceae, Polaribacter</i>   | 2.0                                                                           |     |
|                                                                                          | <i>Bacteroidetes, Flavobacteria, Flavobacteriales, Flavobacteriaceae</i>                 | 1.8                                                                           |     |
|                                                                                          | <i>Bacteroidetes, Flavobacteria, Flavobacteriales, Cryomorphaceae</i>                    | 1.7                                                                           |     |
|                                                                                          | Unknown Bacteria                                                                         | 1.5                                                                           |     |
|                                                                                          | <i>Bacteroidetes, Flavobacteria, Flavobacteriales</i>                                    | 1.3                                                                           |     |
|                                                                                          | <i>Verrucomicrobia, Opitutae</i>                                                         | 1.2                                                                           |     |
|                                                                                          | <i>Proteobacteria, Alphaproteobacteria, Rhodobacterales, Rhodobacteraceae</i>            | 1.2                                                                           |     |
|                                                                                          |                                                                                          | Sum: 20.8                                                                     |     |
|                                                                                          | Epipelagic                                                                               | <i>Proteobacteria, Alphaproteobacteria, Rhodobacterales, Rhodobacteraceae</i> | 5.6 |
| Unknown Bacteria                                                                         |                                                                                          | 3.0                                                                           |     |
| <i>Bacteroidetes, Flavobacteria, Flavobacteriales, Flavobacteriaceae</i>                 |                                                                                          | 2.0                                                                           |     |
| <i>Bacteroidetes, Flavobacteria, Flavobacteriales, Flavobacteriaceae</i>                 |                                                                                          | 2.0                                                                           |     |
| <i>Bacteroidetes, Flavobacteria, Flavobacteriales, Flavobacteriaceae</i>                 |                                                                                          | 1.8                                                                           |     |
| <i>Cyanobacteria, Cyanobacteria, Family II, GpIIa</i>                                    |                                                                                          | 1.7                                                                           |     |
| <i>Bacteroidetes, Flavobacteria, Flavobacteriales, Flavobacteriaceae</i>                 |                                                                                          | 1.6                                                                           |     |
| <i>Proteobacteria, Gammaproteobacteria</i>                                               |                                                                                          | 1.5                                                                           |     |
| <i>Bacteroidetes, Flavobacteria, Flavobacteriales, Flavobacteriaceae</i>                 |                                                                                          | 1.2                                                                           |     |
| <i>Bacteroidetes, Flavobacteria, Flavobacteriales, Flavobacteriaceae</i>                 |                                                                                          | 1.2                                                                           |     |
|                                                                                          |                                                                                          | Sum: 21.7                                                                     |     |
| Mesopelagic                                                                              | <i>Proteobacteria, Alphaproteobacteria, Rickettsiales, SAR11, Pelagibacter</i>           | 14.0                                                                          |     |
|                                                                                          | <i>Proteobacteria</i>                                                                    | 1.5                                                                           |     |
|                                                                                          | <i>Proteobacteria, Alphaproteobacteria</i>                                               | 1.2                                                                           |     |
|                                                                                          | <i>Bacteroidetes, Flavobacteria, Flavobacteriales, Flavobacteriaceae,</i>                | 1.1                                                                           |     |
|                                                                                          | <i>Proteobacteria, Gammaproteobacteria</i>                                               | 1.0                                                                           |     |
|                                                                                          | <i>Bacteroidetes, Flavobacteria, Flavobacteriales, Flavobacteriaceae, Polaribacter</i>   | 0.9                                                                           |     |
|                                                                                          | <i>Bacteroidetes, Flavobacteria, Flavobacteriales, Flavobacteriaceae</i>                 | 0.9                                                                           |     |
|                                                                                          | Unknown Bacteria                                                                         | 0.7                                                                           |     |
|                                                                                          | <i>Bacteroidetes, Flavobacteria, Flavobacteriales</i>                                    | 0.6                                                                           |     |
|                                                                                          | <i>Proteobacteria, Alphaproteobacteria, Rickettsiales, SAR11, Pelagibacter</i>           | 0.4                                                                           |     |
|                                                                                          | Sum: 22.2                                                                                |                                                                               |     |
| Shelf Bottom                                                                             | <i>Proteobacteria, Gammaproteobacteria</i>                                               | 16.4                                                                          |     |
|                                                                                          | <i>Proteobacteria, Gammaproteobacteria</i>                                               | 3.2                                                                           |     |
|                                                                                          | <i>Proteobacteria, Gammaproteobacteria</i>                                               | 2.2                                                                           |     |
|                                                                                          | <i>Proteobacteria, Gammaproteobacteria</i>                                               | 2.2                                                                           |     |
|                                                                                          | Unknown Bacteria                                                                         | 1.1                                                                           |     |
|                                                                                          | <i>Bacteroidetes, Flavobacteria, Flavobacteriales, Flavobacteriaceae</i>                 | 1.0                                                                           |     |
|                                                                                          | <i>Proteobacteria, Gammaproteobacteria</i>                                               | 1.0                                                                           |     |
|                                                                                          | <i>Actinobacteria</i>                                                                    | 0.8                                                                           |     |
|                                                                                          | <i>Bacteroidetes</i>                                                                     | 0.7                                                                           |     |
|                                                                                          | <i>Bacteroidetes</i>                                                                     | 0.7                                                                           |     |
|                                                                                          |                                                                                          | Sum: 29.3                                                                     |     |
| Slope Bottom                                                                             | Unknown Bacteria                                                                         | 8.4                                                                           |     |
|                                                                                          | Unknown Bacteria                                                                         | 4.2                                                                           |     |
|                                                                                          | <i>Bacteroidetes, Flavobacteria, Flavobacteriales, Flavobacteriaceae</i>                 | 2.7                                                                           |     |
|                                                                                          | <i>Proteobacteria, Alphaproteobacteria, Rickettsiales, SAR11, Pelagibacter</i>           | 1.8                                                                           |     |
|                                                                                          | <i>Proteobacteria, Gammaproteobacteria</i>                                               | 1.8                                                                           |     |
|                                                                                          | <i>Proteobacteria, Alphaproteobacteria, Rickettsiales, SAR11, Pelagibacter</i>           | 1.7                                                                           |     |
|                                                                                          | <i>Proteobacteria, Gammaproteobacteria</i>                                               | 1.3                                                                           |     |
|                                                                                          | <i>Bacteroidetes, Flavobacteria, Flavobacteriales, Flavobacteriaceae</i>                 | 1.2                                                                           |     |
|                                                                                          | <i>Proteobacteria, Alphaproteobacteria, Rickettsiales, SAR11, Pelagibacter</i>           | 1.1                                                                           |     |
|                                                                                          | Unknown Bacteria                                                                         | 0.9                                                                           |     |
|                                                                                          | Sum: 25.1                                                                                |                                                                               |     |
